# Supplementary material
Source: Springer Nature journal article supplement (https://www.springermedizin.de/resource/supplementary/12969_2014_1722_MOESM1_ESM.pdf/9590640)
Supplement: MOESM1 [file 9590640]

Appendix 1. Quality in Prognostic Studies (QUIPS) tool

| <b>Domains</b>                       | <b>Prompting items for Consideration</b>                                                                                                                                                                                                                                                                                                                                                                                                                                                                   | <b>Ratings</b>                                                                                                                                                                                                                                                                                                                                                                                                                             |
|--------------------------------------|------------------------------------------------------------------------------------------------------------------------------------------------------------------------------------------------------------------------------------------------------------------------------------------------------------------------------------------------------------------------------------------------------------------------------------------------------------------------------------------------------------|--------------------------------------------------------------------------------------------------------------------------------------------------------------------------------------------------------------------------------------------------------------------------------------------------------------------------------------------------------------------------------------------------------------------------------------------|
| <b>Study Participation</b>           | <ul style="list-style-type: none"> <li>a. Adequate participation in the study by eligible persons</li> <li>b. Description of the source population or population of interest</li> <li>c. Description of the baseline study sample</li> <li>d. Adequate description of the sampling frame and recruitment</li> <li>e. Adequate description of the period and place of recruitment</li> <li>f. Adequate description of inclusion and exclusion criteria</li> </ul>                                           | <p><b>High bias:</b> The relationship between the PF and outcome is very likely to be different for participants and eligible nonparticipants</p> <p><b>Moderate bias:</b> The relationship between the PF and outcome may be different for participants and eligible nonparticipants</p> <p><b>Low bias:</b> The relationship between the PF and outcome is unlikely to be different for participants and eligible nonparticipants</p>    |
| <b>Study Attrition</b>               | <ul style="list-style-type: none"> <li>a. Adequate response rate for study participants</li> <li>b. Description of attempts to collect information on participants who dropped out</li> <li>c. Reasons for loss to follow-up are provided</li> <li>d. Adequate description of participants lost to follow-up</li> <li>e. There are no important differences between participants who completed the study and those who did not</li> </ul>                                                                  | <p><b>High bias:</b> The relationship between the PF and outcome is very likely to be different for completing and non-completing participants</p> <p><b>Moderate bias:</b> The relationship between the PF and outcome may be different for completing and non-completing participants</p> <p><b>Low bias:</b> The relationship between the PF and outcome is unlikely to be different for completing and non-completing participants</p> |
| <b>Prognostic Factor Measurement</b> | <ul style="list-style-type: none"> <li>a. A clear definition or description of the PF is provided</li> <li>b. Method of PF measurement is adequately valid and reliable</li> <li>c. Continuous variables are reported or appropriate cut points are used</li> <li>d. The method and setting of measurement of PF is the same for all study participants</li> <li>e. Adequate proportion of the study sample has complete data for the PF</li> <li>f. Appropriate methods of imputation are used</li> </ul> | <p><b>High bias:</b> The measurement of the PF is very likely to be different for different levels of the outcome of interest</p> <p><b>Moderate bias:</b> The measurement of the PF may be different for different levels of the outcome of interest</p> <p><b>Low bias:</b> The measurement of the PF is unlikely to be different for different levels of the outcome of interest</p>                                                    |

|                                           |                                                                                                                                                                                                                                                                                                                                                                                                                                                                                                                                                                                                                                     |                                                                                                                                                                                                                                                                                                                                                                                                                              |
|-------------------------------------------|-------------------------------------------------------------------------------------------------------------------------------------------------------------------------------------------------------------------------------------------------------------------------------------------------------------------------------------------------------------------------------------------------------------------------------------------------------------------------------------------------------------------------------------------------------------------------------------------------------------------------------------|------------------------------------------------------------------------------------------------------------------------------------------------------------------------------------------------------------------------------------------------------------------------------------------------------------------------------------------------------------------------------------------------------------------------------|
|                                           | for missing PF data                                                                                                                                                                                                                                                                                                                                                                                                                                                                                                                                                                                                                 |                                                                                                                                                                                                                                                                                                                                                                                                                              |
| <b>Outcome Measurement</b>                | <ul style="list-style-type: none"> <li>a. A clear definition of the outcome is provided</li> <li>b. Method of outcome measurement used is adequately valid and reliable</li> <li>c. The method and setting of outcome measurement is the same for all study participants</li> </ul>                                                                                                                                                                                                                                                                                                                                                 | <p><b>High bias:</b> The measurement of the outcome is very likely to be different related to the baseline level of the PF</p> <p><b>Moderate bias:</b> The measurement of the outcome may be different related to the baseline level of the PF</p> <p><b>Low bias:</b> The measurement of the outcome is unlikely to be different related to the baseline level of the PF</p>                                               |
| <b>Study Confounding</b>                  | <ul style="list-style-type: none"> <li>a. All important confounders are measured</li> <li>b. Clear definitions of the important confounders measured are provided</li> <li>c. Measurement of all important confounders is adequately valid and reliable</li> <li>d. The method and setting of confounding measurement are the same for all study participants</li> <li>e. Appropriate methods are used if imputation is used for missing confounder data</li> <li>f. Important potential confounders are accounted for in the study design</li> <li>g. Important potential confounders are accounted for in the analysis</li> </ul> | <p><b>High bias:</b> The observed effect of the PF on the outcome is very likely to be distorted by another factor related to PF and outcome</p> <p><b>Moderate bias:</b> The observed effect of the PF on outcome may be distorted by another factor related to PF and outcome</p> <p><b>Low bias:</b> The observed effect of the PF on outcome is unlikely to be distorted by another factor related to PF and outcome</p> |
| <b>Statistical Analysis and Reporting</b> | <ul style="list-style-type: none"> <li>a. Sufficient presentation of data to assess the adequacy of the analytic strategy</li> <li>b. Strategy for model building is appropriate and is based on a conceptual framework or model</li> <li>c. The selected statistical model is adequate for the design of the study</li> <li>d. There is no selective reporting of results</li> </ul>                                                                                                                                                                                                                                               | <p><b>High bias:</b> The reported results are very likely to be spurious or biased related to analysis or reporting</p> <p><b>Moderate bias:</b> The reported results may be spurious or biased related to analysis or reporting</p> <p><b>Low bias:</b> The reported results are unlikely to be spurious or biased related to analysis or</p>                                                                               |

|  |  |           |
|--|--|-----------|
|  |  | reporting |
|--|--|-----------|

**Source:** Hayden JA, van der Windt DA, Cartwright JL, Côté P, Bombardier C. Assessing bias in studies of prognostic factors. *Ann Intern Med.* 2013;158(4):280-6

**Abbreviation:** PF prognostic factor
